# Supplementary material
Source: PubMed Central journal article supplement (PMC4325142)
Supplement: AEM.03791-14_zam999116077so1.pdf [file AEM.03791-14_zam999116077so1.pdf]

**Fig. S1:** Alignment of the A0671 protein (query) with the B1632 protein (subject).

```

Query 27  NPFAAL-AQPALEYALDAWQRTVLLLDILRQRGNESAEHELEGMPVVLVFEHELLADGRQ 85
Sbjct 49  NPMAGMDPMSSYAYAIIDSMQRAILFWDTLRQRGNNFVENTMQGLKPVLFHGYETVLDARQ 108

Query 86  LPEPANYALLRIVPPADSPDTPALRPFVVIDPRAGHGPGIGGFKADSEIGIALRTGHPCY 145
Sbjct 109 FERPVNYALLKIIPPDGVTTIDDSRRPYVIIDPRAGHGPGIGGFKDSDSQVGVAMRAGHPVY 168

Query 146 FITFFYEPGQGTIESVARAEAAFLQIVGERHPDAPGKPFIIIGNCQAGWALMMLAAVAPE 205
Sbjct 169 FVIFFRDPEPGQTTLLDVCEAEQQFIKRVRELHPHS-AKPAIIGNCQGGWAAMMLGASDPG 227

Query 206 RTGPLLLAGAPLAYWSGV----RGRNPMRYSGGLLGGSWLASLIADLGNFRFDGAWLVEN 261
Sbjct 228 DTGPIVINGAPMSYWSGAWSEGEDNPMRYSGGLLGGTTLASYTADLGNKFDGAWLVQN 287

Query 262 FEQLNPANTLWEKLYDVYAKADTEGPRFLDFERWWGGHFLMNRAEIDWIVQKLFVGNRLT 321
Sbjct 288 FENLNPSNSLWDKYYNLYKKADTEPPRFLEFERWWGGYYLMNREEIEWITRNLFVGNKLW 347

Query 322 AGEVIRSTDGKTVVDLRNVRSPVIIIFASWGDNITPPQALNWPIDLYASDEELVANDQVIV 381
Sbjct 348 GGEVKNAGGKA-FDLREIRSPIVLFASMGDNITPPQAFNWWVDIYGSTEEIKARGQVIV 406

Query 382 YCLHPTVGHLGIFVSAGVANREHSELFCALDLIDVLPGLYEAKIEDVAPDLRHRDLVEG 441
Sbjct 407 GMMHRSVHGLGIFVSGKVAQKEHAQIVSVLKSIELLPPGLYGMVIH----ERKGS DGVD- 461

Query 442 RYLRFERRGIADILALDD--GRDDERAFEVVRRVAEVNQHIYDTFASPWVRAMSNELSA 499
Sbjct 462 -YEVQFEHSLEEIASRLNRFERADEKPFETVANLSDFTRAYELFAQPYVQAVSNEMTA 520

Query 500 QWLRALRPARLERELATDVNPWMAWIGALAPLVREHRAPVSADNPLLTLEHAASAQIVSA 559
Sbjct 521 RVLREFHPLRMQNWLFSDLNPWMAWLKPAADAVRASRQTLEPDHPLRQEQVGAEMLSAG 580

Query 560 LDQFRDLRDAWYERAFEAIIYASPAMAALVGLRAPAPVNLESPVTVALRKELAAARLHD-- 617
Sbjct 581 LDAYRAVRDAMTEYTFNRYAN-----LFPFQPRSEPT-ARAGTPAATDPHDLP 628

Query 618 ----AEEAIGGGTLEAFVRVLAYVADRPSAIEERPFNLLRRIAREQQQATGQSGGQADL 673
Sbjct 629 EVKAALAAVGGGYAEAIARLACLLSRGPELP-----LSRLELRKELVTDYADLLPEL 682

Query 674 A--AFKTAVRQQSFIVRLDPQRAIRALPALVPDRETRRKLMAAHRV 718
Sbjct 683 EPDAWREIRGRQELITRYAPEQALATLPALLRYQADRQRLQALAEKL 729

```

The image was taken from blastP analysis of the A0671 protein. Identical or similar (+) amino acids present in both proteins are indicated in the respective middle lines.
